# Supplementary material
Source: HighWire-hosted journal article supplement (https://fg.bmj.com/content/8/1/8)
Supplement: inline-supplementary-material-1 [file inline-supplementary-material-1.pdf]

| Question No. | Question Text                                                                                                                                 | Mandatory | Answer choices | Free text option |
|--------------|-----------------------------------------------------------------------------------------------------------------------------------------------|-----------|----------------|------------------|
| 1            | Does your department use a validated risk assessment score (e.g. Blatchford / Rockall) when admitting patients with AUGIB?                    | Yes       | Yes            | Yes              |
| 2            | Are all acute admissions offered an endoscopy within 24 hours of admission with a GI bleed?                                                   | Yes       | Yes            | No               |
| 3            | Are all inpatients offered an endoscopy within 24 hours of having a GI bleed?                                                                 | Yes       | Yes            | No               |
| 4            | Do you have an AUGIB rota that offers endoscopy to unstable patients 24/7 if required?                                                        | Yes       | Yes            | No               |
| 5            | Do you operate an ad hoc rota?                                                                                                                | Yes       | Yes            | No               |
| 6            | Do you have a formal agreement with another trust (trusts) to offer this service?                                                             | Yes       | Yes            | No               |
| 7            | Do you have trainees on the rota as sole operators (i.e. do not require a consultant to come in from home as well) ?                          | Yes       | Yes            | No               |
| 8            | Are any of your endoscopists on any other rotas (eg. general medical rotas) ?                                                                 | Yes       | Yes            | No               |
| 9            | Do you have an endoscopy nurse rota for AUGIB?                                                                                                | Yes       | Yes            | No               |
| 10           | Do other nurses cross cover in case of an out of hours AUGIB?                                                                                 | Yes       | Yes            | No               |
| 11           | Do you have interventional radiology (IR) on site?                                                                                            | Yes       | Yes            | No               |
| 12           | Are you part of a network with appropriate patient pathways to provide out of hours interventional radiology?                                 | Yes       | Yes            | No               |
| 13           | If you can offer an OOH service but not a next day service, what stops you offering a next day OGD service for those bleeders who are stable? | No        | No             | Yes              |
| 14           | If, since the March 2013 survey, you have introduced an OOH service for AUGIB patients, how did you achieve this?                             | No        | No             | Yes              |
| 15           | Did the findings of the endoscopy survey undertaken in 2013 influence service development? If so how?                                         | Yes       | Yes            | Yes              |
| 16           | Do you have a surgical rota able to provide the surgery necessary in case of failure to control UGI haemorrhage by endoscopic or IR methods?  | Yes       | Yes            | Yes              |
| 17           | Are there any issues that you want to let us know about, which have not been covered in this survey?                                          | No        | No             | Yes              |
